# Supplementary material
Source: publisher figshare collection journal article supplement (https://frontiersin.figshare.com/ndownloader/files/26200439)
Supplement: Supplementary file 1 [file 26200439]

**Table S1.** Model selection outputs from Cox proportional hazards models of shark detection probability. Data were censored to the last day of acoustic receiver deployment

| **Model** | **df** | **AIC** |
| --- | --- | --- |
| Detected ~ species + mindistkm + TLm + sex | 4 | 255.558 |
| Detected ~ species + mindistkm + TLm | 3 | 253.7259 |
| Detected ~ species + mindistkm | 2 | 251.837 |
| Detected ~ species | 1 | 249.8935 |
